# Supplementary material for: High temperature spin crossover behaviour of mononuclear bis-(thiocyanato)iron(ii) complexes with judiciously designed bidentate N-donor Schiff bases with varying substituents
Source: Royal Society of Chemistry journal article supplement (doi:10.1039/d2dt00416j), 2022-01-01
Supplement: d2dt00416j1.pdf [file d2dt00416j1.pdf]

## High temperature spin crossover behaviour of mononuclear bis-(thiocyanato)iron(II) complexes with judiciously designed bidentate N-donor Schiff bases with varying substituent

Kishalay Bhar,<sup>a</sup> Wenbin Guo,<sup>b</sup> Mathieu Gonidec,<sup>b</sup> Venkata Nikhil Raj M.,<sup>a</sup> Surabhi Bhatt,<sup>a</sup> Franc Perdih,<sup>c</sup> Philippe Guionneau,<sup>\*b</sup> Guillaume Chastanet,<sup>\*b</sup> and Anuj K. Sharma<sup>\*a</sup>

<sup>a</sup>Department of Chemistry, School of Chemical Sciences and Pharmacy, Central University of Rajasthan, NH-8, Bandarsindri, Ajmer Distt. Rajasthan-305817 India. <sup>b</sup>Univ. Bordeaux, CNRS, Bordeaux INP, ICMCB, UMR 5026, 87 avenue du Dr A. Schweitzer, F-33600 Pessac, France. <sup>c</sup>Faculty of Chemistry and Chemical Technology, University of Ljubljana, Vecna pot 113, PO Box 537, SI-1000 Ljubljana, Slovenia.

### Supporting Information

Table S1 Mössbauer spectral data of 1-3 at 296 K

| Compound | Isomer Shift ( $\delta$ ) (mm/sec) | Quadrupole splitting ( $\Delta EQ$ ) (mm/sec) |
|----------|------------------------------------|-----------------------------------------------|
| 1        | 0.3163 $\pm$ 0.01196               | 0.6668 $\pm$ 0.02131                          |
| 2        | 0.0626 $\pm$ 0.024                 | 0.282 $\pm$ 0.071                             |
| 3        | 0.2992 $\pm$ 0.01517               | 0.6308 $\pm$ 0.0259                           |

Figure S1 Mössbauer spectra of complexes 1-3 at 296 K

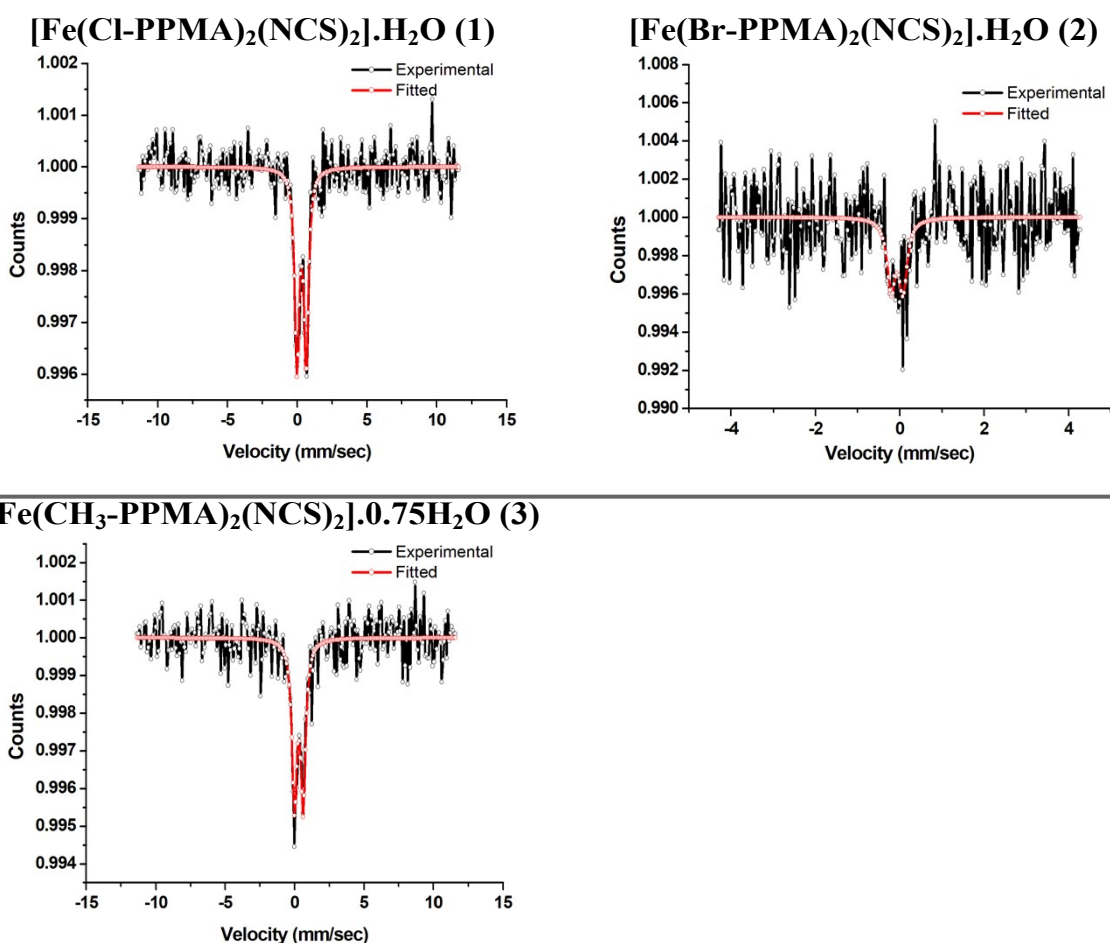

**Table S2** Crystal data and structure refinement parameters for **1-3** at RT

|                                                     | <b>1<sup>RT</sup></b>                                                            | <b>2<sup>RT</sup></b>                                                            | <b>3<sup>RT</sup></b>                                            |
|-----------------------------------------------------|----------------------------------------------------------------------------------|----------------------------------------------------------------------------------|------------------------------------------------------------------|
| <b>Formula</b>                                      | C <sub>36</sub> H <sub>26</sub> N <sub>6</sub> S <sub>2</sub> Cl <sub>2</sub> Fe | C <sub>38</sub> H <sub>26</sub> N <sub>6</sub> S <sub>2</sub> Br <sub>2</sub> Fe | C <sub>40</sub> H <sub>32</sub> N <sub>6</sub> S <sub>2</sub> Fe |
| <b>Formula Weight (g/mol)</b>                       | 757.52                                                                           | 846.44                                                                           | 716.68                                                           |
| <b>Size (mm<sup>3</sup>)</b>                        | 0.60×0.20×0.18                                                                   | 0.60×0.40×0.12                                                                   | 0.45×0.15×0.12                                                   |
| <b>Crystal system</b>                               | Tetragonal                                                                       |                                                                                  |                                                                  |
| <b>Space group</b>                                  | <i>P</i> 4 <sub>3</sub> 2 <sub>1</sub> 2 (No. 96)                                | <i>P</i> 4 <sub>1</sub> 2 <sub>1</sub> 2 (No. 92)                                | <i>P</i> 4 <sub>1</sub> 2 <sub>1</sub> 2 (No. 92)                |
| <b>a (Å)</b>                                        | 17.6439(7)                                                                       | 17.7700(8)                                                                       | 17.7428(6)                                                       |
| <b>c (Å)</b>                                        | 12.2291(5)                                                                       | 12.1810(5)                                                                       | 12.2100(4)                                                       |
| <b>Volume (Å<sup>3</sup>)</b>                       | 3807.0(3)                                                                        | 3846.4(4)                                                                        | 3843.8(3)                                                        |
| <b><math>\rho_{calc}</math> (g.cm<sup>-3</sup>)</b> | 1.322                                                                            | 1.462                                                                            | 1.238                                                            |
| <b><math>\mu</math> (mm<sup>-1</sup>)</b>           | 0.681                                                                            | 2.613                                                                            | 0.536                                                            |
| <b>GOF on <math>F^2</math></b>                      | 1.028                                                                            | 1.009                                                                            | 1.015                                                            |
| <b><math>R_1, wR_2</math></b>                       | 0.0372                                                                           | 0.0430                                                                           | 0.0386                                                           |
| <b><math>[I &gt; 2\sigma(I)]</math></b>             | 0.0726                                                                           | 0.0736                                                                           | 0.0768                                                           |
| <b><math>R_1, wR_2</math></b>                       | 0.0609                                                                           | 0.0823                                                                           | 0.0597                                                           |
| <b>[all data]</b>                                   | 0.0828                                                                           | 0.0850                                                                           | 0.0848                                                           |
| <b>Largest diff. peak/hole (e.Å<sup>-3</sup>)</b>   | 0.238/-0.207                                                                     | 0.339/-0.365                                                                     | 0.282/-0.153                                                     |
| <b>Flack value</b>                                  | -0.005(9)                                                                        | -0.024(6)                                                                        | -0.014(8)                                                        |
| <b>CCDC</b>                                         | 1978235                                                                          | 1978236                                                                          | 1978237                                                          |

**Table S3** The coordination sphere parameters for **1-3** at RT

|                              | <b>1<sup>RT</sup></b> | <b>2<sup>RT</sup></b> | <b>3<sup>RT</sup></b> |
|------------------------------|-----------------------|-----------------------|-----------------------|
| <b>Fe1-N1(pyridine)/Å</b>    | 1.977(2)              | 1.977(3)              | 1.971(2)              |
| <b>Fe1-N2(imine)/Å</b>       | 1.970(2)              | 1.965(4)              | 1.958(2)              |
| <b>Fe1-N3(NCS)/Å</b>         | 1.956(3)              | 1.967(4)              | 1.962(3)              |
| <b>&lt;Fe-N&gt;/Å</b>        | 1.966                 | 1.969                 | 1.963                 |
| <b><math>\zeta</math>/Å</b>  | 0.041                 | 0.027                 | 0.033                 |
| <b><math>\Sigma</math>/°</b> | 43.8                  | 44.5                  | 42.8                  |
| <b><math>\Theta</math>/°</b> | 136                   | 136                   | 138                   |
| <b>Spin state</b>            | LS                    | LS                    | LS                    |

Symmetry code: (i) *y, x, -z + 1*. LS = Low spin.

**Figure S2** (a) Experimental and (b) simulated powder-XRD plots of complex **1** at 300 K.

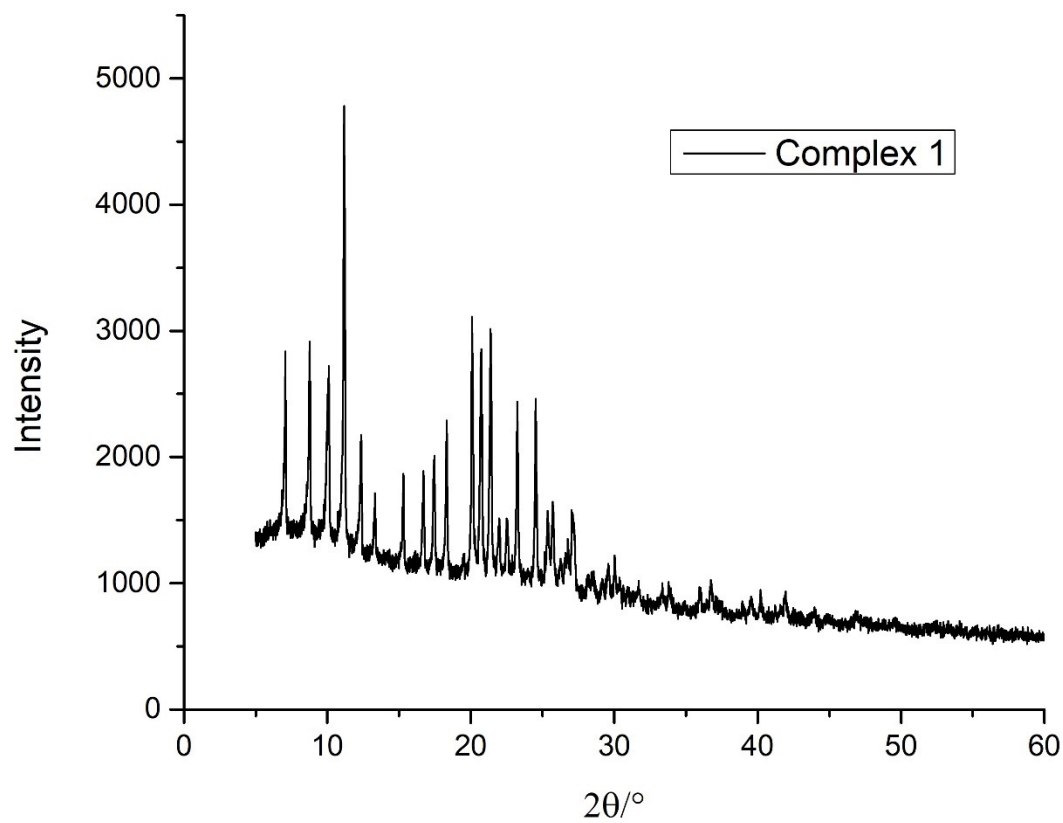

(a)

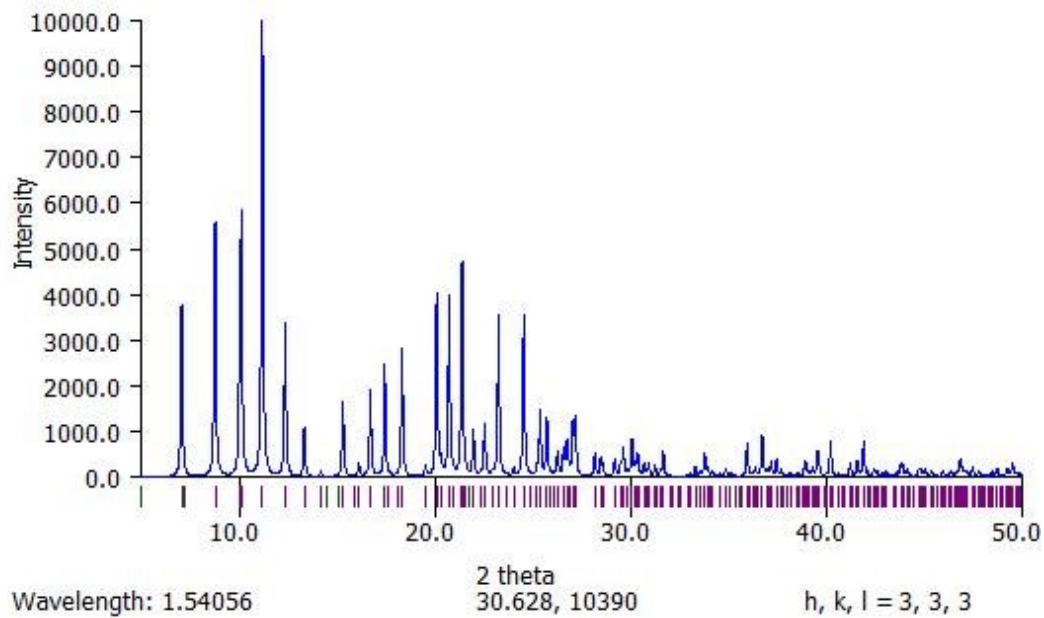

(b)

**Figure S3** (a) Experimental and (b) simulated powder-XRD plots of complex **2** at 300 K.

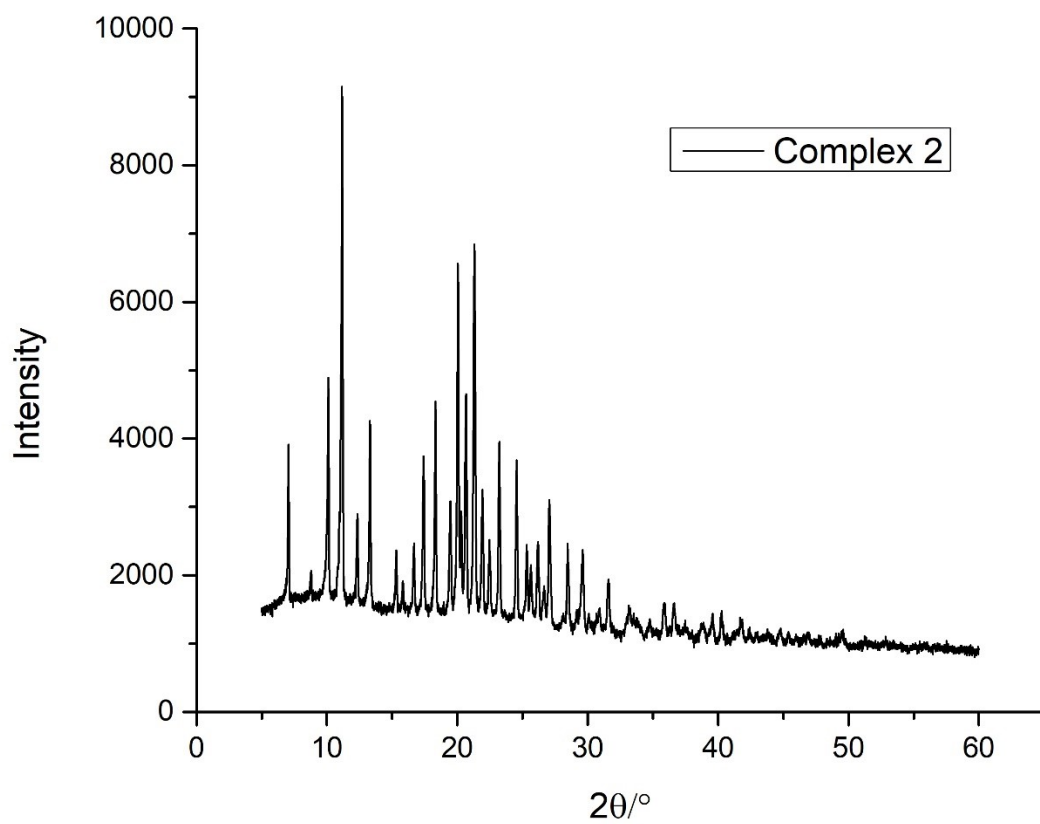

(a)

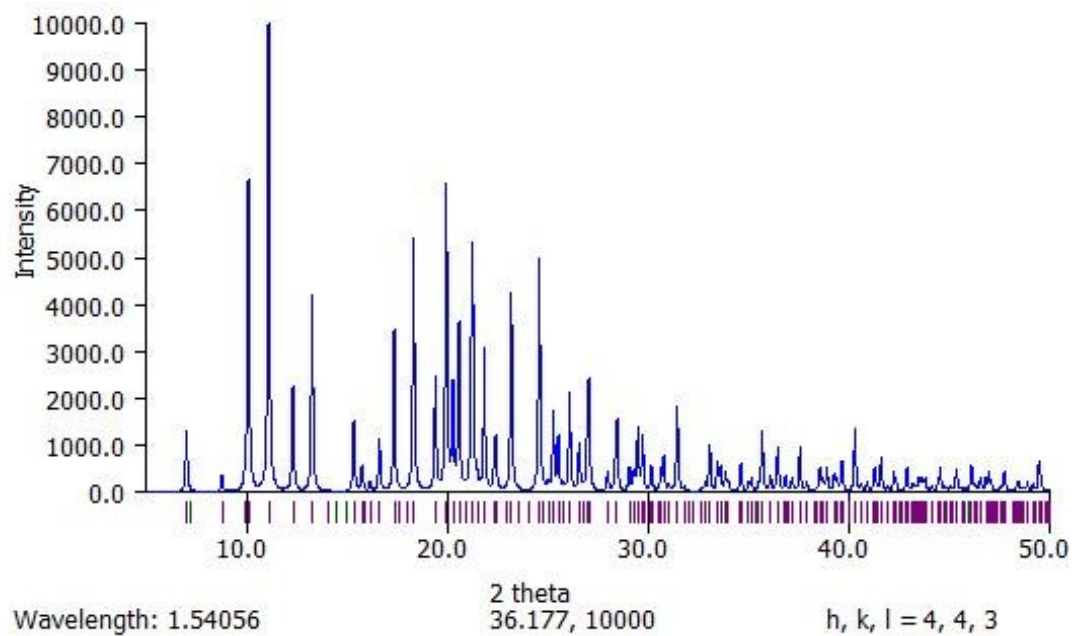

(b)

**Figure S4** (a) Experimental and (b) simulated powder-XRD plots of complex **3** at 300 K.

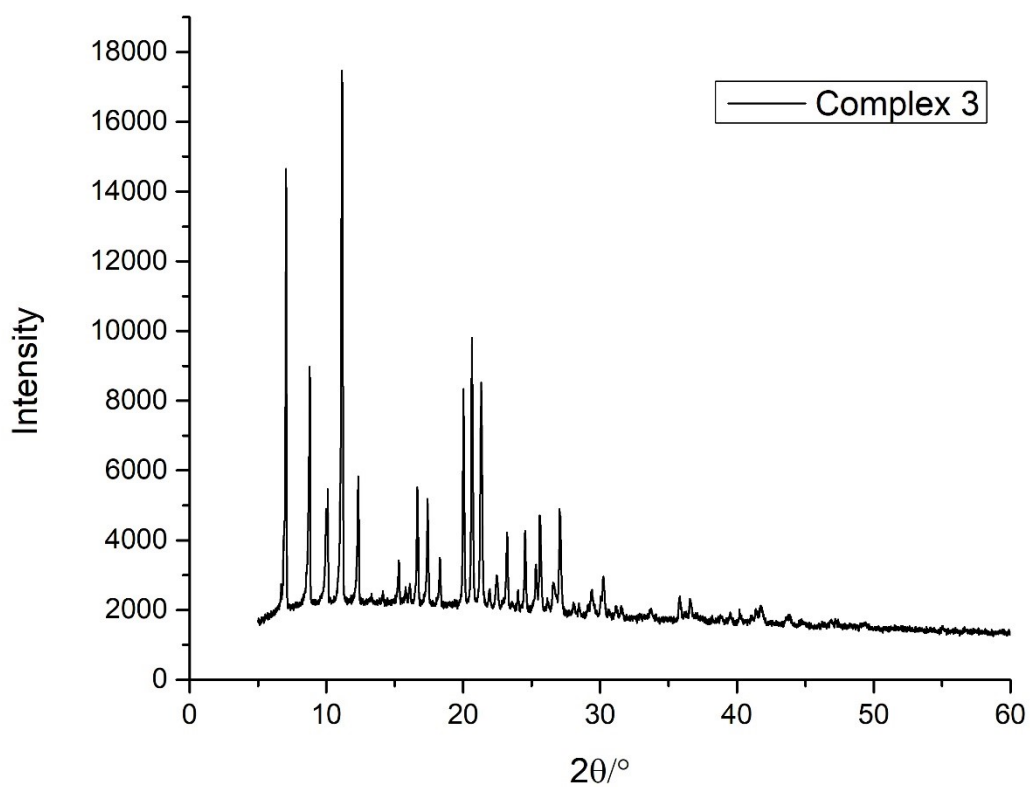

(a)

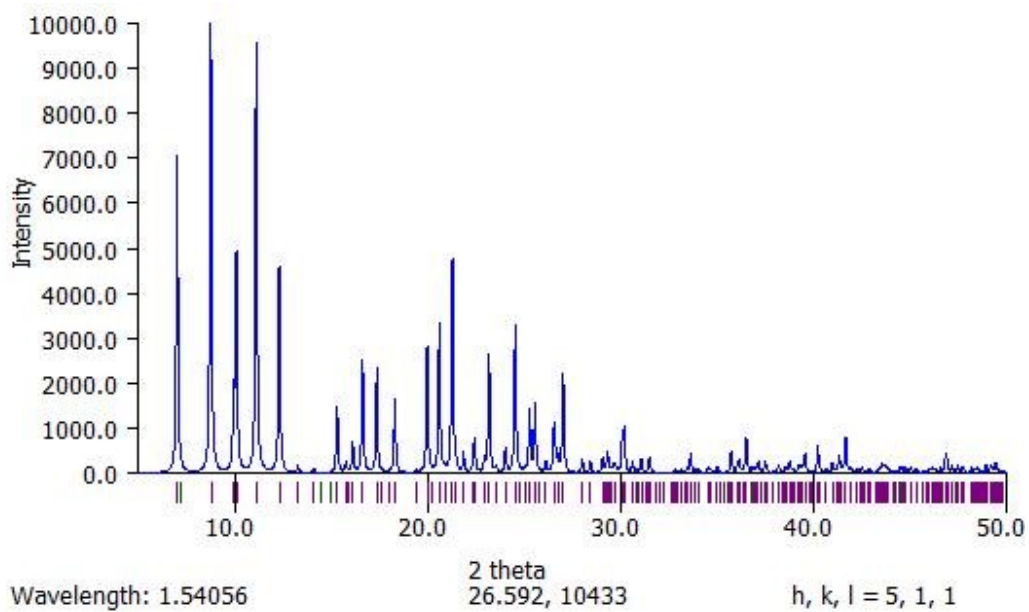

(b)

Figure S5 TGA plot of complexes 1-3 in the temperature range 30-800 °C.

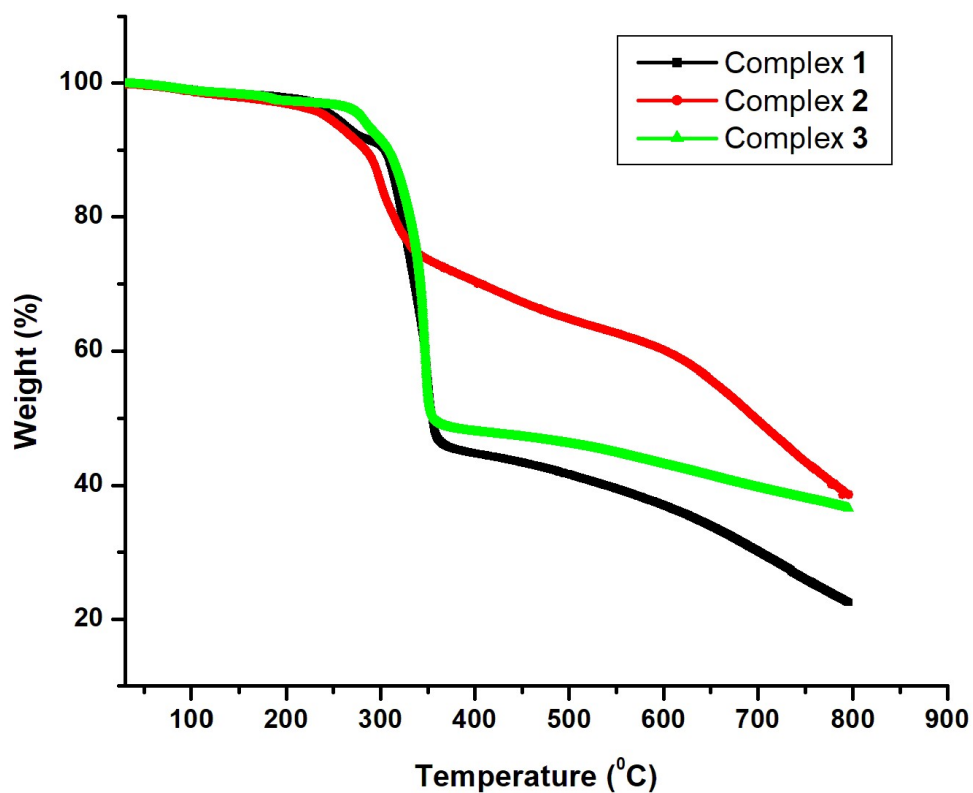

Figure S6 TGA plot and loss of water in complex 1.

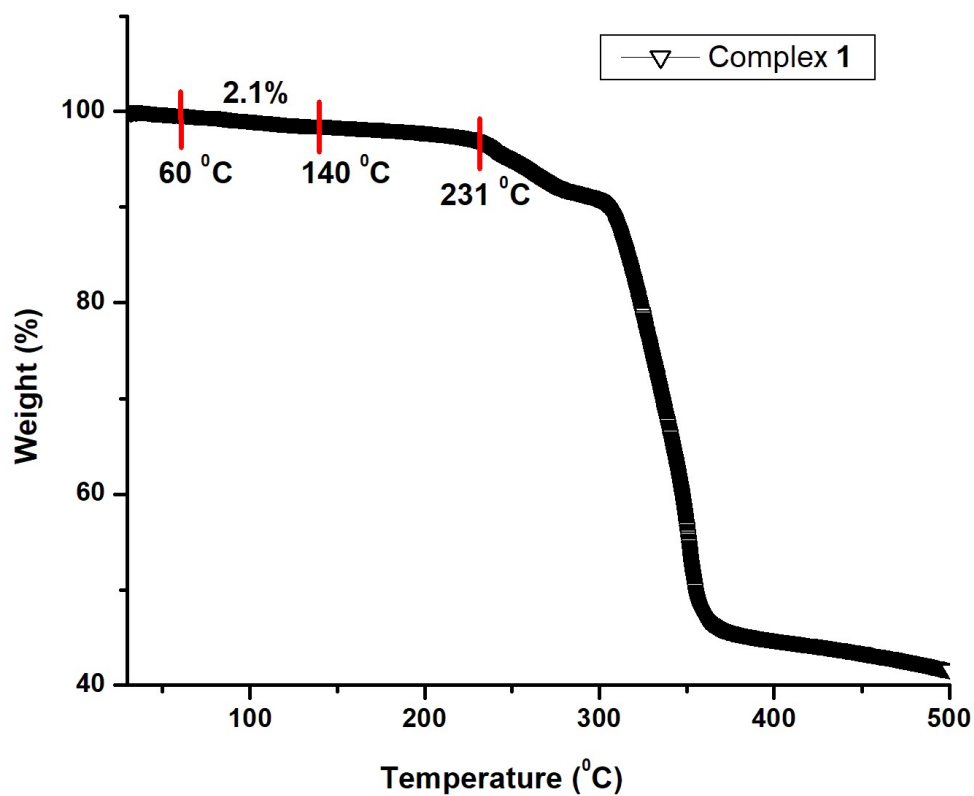

Figure S7 TGA plot and loss of water in complex 2.

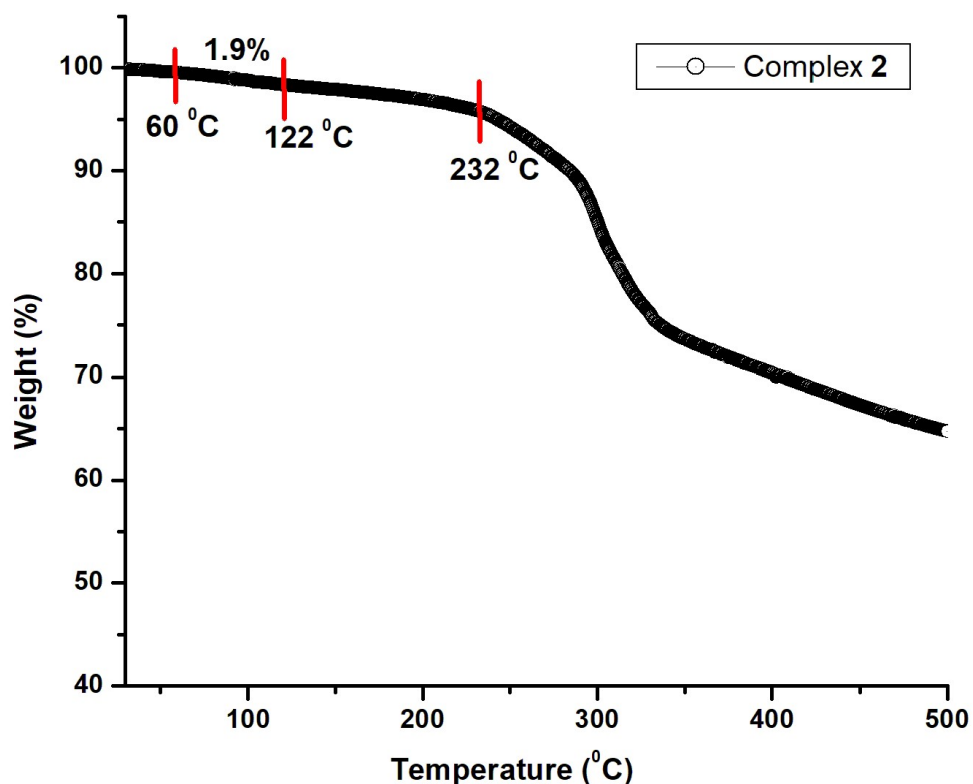

Table S4 Selected crystallographic parameters at various temperatures for 1

|                                                   | 1150K                                                                                          | 1250K        | 1300K        | 1350K        | 1400K                                                                                          | 1450K       |
|---------------------------------------------------|------------------------------------------------------------------------------------------------|--------------|--------------|--------------|------------------------------------------------------------------------------------------------|-------------|
| <b>Formula</b>                                    | C <sub>76</sub> H <sub>52</sub> N <sub>12</sub> S <sub>4</sub> Cl <sub>4</sub> Fe <sub>2</sub> |              |              |              | C <sub>76</sub> H <sub>52</sub> N <sub>12</sub> S <sub>4</sub> Cl <sub>4</sub> Fe <sub>2</sub> |             |
| <b>F. W. (g/mol)</b>                              | 1515.03                                                                                        |              |              |              | 1515.03                                                                                        |             |
| <b>Size (mm<sup>3</sup>)</b>                      | 0.20×0.06×0.06                                                                                 |              |              |              |                                                                                                |             |
| <b>Space group</b>                                | P4 <sub>3</sub> 2 <sub>1</sub> 2                                                               |              |              |              |                                                                                                |             |
| <b>a (Å)</b>                                      | 17.4989(11)                                                                                    | 17.586(3)    | 17.6150(6)   | 17.6560(7)   | 17.6740(7)                                                                                     | 17.7562(15) |
| <b>c (Å)</b>                                      | 12.1221(11)                                                                                    | 12.194(2)    | 12.2291(5)   | 12.3860(6)   | 12.5284(6)                                                                                     | 12.5703(13) |
| <b>Volume (Å<sup>3</sup>)</b>                     | 3711.9(6)                                                                                      | 3771.2(14)   | 3794.5(3)    | 3861.1(4)    | 3913.5(4)                                                                                      | 3963.2(8)   |
| <b>ρ<sub>calc</sub> (g.cm<sup>-3</sup>)</b>       | 1.356                                                                                          | 1.334        | 1.326        | 1.303        | 1.286                                                                                          | 1.270       |
| <b>μ (mm<sup>-1</sup>)</b>                        | 0.698                                                                                          | 0.687        | 0.683        | 0.671        | 0.662                                                                                          | 0.654       |
| <b>GOF on F<sup>2</sup></b>                       | 0.969                                                                                          | 1.049        | 1.023        | 1.040        | 1.049                                                                                          | 1.124       |
| <b>R<sub>1</sub>, wR<sub>2</sub></b>              | 0.0354                                                                                         | 0.0324       | 0.0384       | 0.0424       | 0.0523                                                                                         | 0.0810      |
| <b>[I&gt;2σ(I)]</b>                               | 0.0706                                                                                         | 0.0691       | 0.0873       | 0.0936       | 0.1217                                                                                         | 0.1783      |
| <b>R<sub>1</sub>, wR<sub>2</sub></b>              | 0.0498                                                                                         | 0.0403       | 0.0498       | 0.0632       | 0.0921                                                                                         | 0.1290      |
| <b>[all data]</b>                                 | 0.0741                                                                                         | 0.0726       | 0.0929       | 0.1065       | 0.1466                                                                                         | 0.2117      |
| <b>Largest diff. peak/hole (e.Å<sup>-3</sup>)</b> | 0.270/-0.295                                                                                   | 0.318/-0.329 | 0.285/-0.314 | 0.213/-0.218 | 0.32/-0.21                                                                                     | 0.40/-0.23  |
| <b>Flack value</b>                                | 0.002(10)                                                                                      | 0.03(2)      | 0.007(4)     | 0.000(4)     | 0.004(5)                                                                                       | 0.019(6)    |
| <b>CCDC</b>                                       | 1979597                                                                                        | 1979599      | 2009216      | 1979600      | 1979604                                                                                        | 1979602     |

**Table S5** Selected crystallographic parameters at various temperatures for **2**

|                                                     | <b>2</b> <sup>150K</sup>                                                         | <b>2</b> <sup>250K</sup>                                                                       | <b>2</b> <sup>300K</sup> | <b>2</b> <sup>350K</sup>                                                                       | <b>2</b> <sup>400K</sup> | <b>2</b> <sup>450K</sup> |
|-----------------------------------------------------|----------------------------------------------------------------------------------|------------------------------------------------------------------------------------------------|--------------------------|------------------------------------------------------------------------------------------------|--------------------------|--------------------------|
| <b>Formula</b>                                      | C <sub>38</sub> H <sub>26</sub> N <sub>6</sub> S <sub>2</sub> Br <sub>2</sub> Fe | C <sub>76</sub> H <sub>52</sub> N <sub>12</sub> S <sub>4</sub> Br <sub>4</sub> Fe <sub>2</sub> |                          | C <sub>76</sub> H <sub>52</sub> N <sub>12</sub> S <sub>4</sub> Br <sub>4</sub> Fe <sub>2</sub> |                          |                          |
| <b>F. W.(g/mol)</b>                                 | 846.44                                                                           | 1692.87                                                                                        |                          | 1692.87                                                                                        |                          |                          |
| <b>Size (mm<sup>3</sup>)</b>                        | 0.24×0.10×0.06                                                                   |                                                                                                |                          |                                                                                                |                          |                          |
| <b>Space group</b>                                  | <i>P4<sub>1</sub>2<sub>1</sub>2</i>                                              |                                                                                                |                          |                                                                                                |                          |                          |
| <b>a (Å)</b>                                        | 17.6160(17)                                                                      | 17.6816(11)                                                                                    | 17.7390(4)               | 17.6859(12)                                                                                    | 17.7629(19)              | 17.834(4)                |
| <b>c (Å)</b>                                        | 12.106(2)                                                                        | 12.1451(11)                                                                                    | 12.1851(4)               | 12.3676(13)                                                                                    | 12.4907(14)              | 12.571(3)                |
| <b>Volume (Å<sup>3</sup>)</b>                       | 3756.8(10)                                                                       | 3797.0(6)                                                                                      | 3834.3(2)                | 3868.5(7)                                                                                      | 3941.1(10)               | 3998(2)                  |
| <b><math>\rho_{calc}</math> (g.cm<sup>-3</sup>)</b> | 1.497                                                                            | 1.481                                                                                          | 1.466                    | 1.453                                                                                          | 1.427                    | 1.406                    |
| <b><math>\mu</math> (mm<sup>-1</sup>)</b>           | 2.675                                                                            | 2.647                                                                                          | 2.621                    | 2.598                                                                                          | 2.550                    | 2.514                    |
| <b>GOF on F<sup>2</sup></b>                         | 1.055                                                                            | 1.047                                                                                          | 1.030                    | 1.103                                                                                          | 1.111                    | 1.103                    |
| <b><math>R_1, wR_2</math></b>                       | 0.0309                                                                           | 0.0453                                                                                         | 0.0450                   | 0.0688                                                                                         | 0.0759                   | 0.0892                   |
| <b><math>[I &gt; 2\sigma(I)]</math></b>             | 0.0892                                                                           | 0.0715                                                                                         | 0.0777                   | 0.1001                                                                                         | 0.1060                   | 0.1176                   |
| <b><math>R_1, wR_2</math></b>                       | 0.0339                                                                           | 0.0600                                                                                         | 0.0596                   | 0.1539                                                                                         | 0.1728                   | 0.1943                   |
| <b>[all data]</b>                                   | 0.0911                                                                           | 0.0755                                                                                         | 0.0821                   | 0.1190                                                                                         | 0.1269                   | 0.1414                   |
| <b>Largest diff. peak/hole (e.Å<sup>-3</sup>)</b>   | 0.314/-0.596                                                                     | 0.418/-0.391                                                                                   | 0.362/-0.371             | 0.95/-0.86                                                                                     | 0.85/-0.66               | 0.61/-0.30               |
| <b>Flack value</b>                                  | 0.003(2)                                                                         | 0.033(14)                                                                                      | 0.046(16)                | 0.016(3)                                                                                       | 0.029(5)                 | 0.032(5)                 |
| <b>CCDC</b>                                         | 1979605                                                                          | 1979607                                                                                        | 2009217                  | 1979608                                                                                        | 1979609                  | 1979611                  |

**Table S6** Evolution of the coordination sphere parameters as a function of temperature for **1**

|                                         | <b>1</b> <sup>150K</sup> | <b>1</b> <sup>250K</sup> | <b>1</b> <sup>300K</sup> | <b>1</b> <sup>350K</sup> | <b>1</b> <sup>400K</sup> | <b>1</b> <sup>450K</sup> |
|-----------------------------------------|--------------------------|--------------------------|--------------------------|--------------------------|--------------------------|--------------------------|
| <b>Fe-N<sub>pyridine</sub> (Å)</b>      | 1.963(3)                 | 1.968(2)                 | 1.977(3)                 | 2.037(3)                 | 2.109(4)                 | 2.151(7)                 |
| <b>Fe-N<sub>imine</sub> (Å)</b>         | 1.954(2)                 | 1.942(19)                | 1.962(3)                 | 2.044(3)                 | 2.144(4)                 | 2.201(6)                 |
| <b>Fe-N<sub>NCS</sub> (Å)</b>           | 1.950(3)                 | 1.957(2)                 | 1.950(3)                 | 1.983(4)                 | 2.039(6)                 | 2.071(10)                |
| <b>&lt;Fe-N&gt; (Å)</b>                 | 1.955(2)                 | 1.956(2)                 | 1.963(3)                 | 2.021(3)                 | 2.097(5)                 | 2.141(8)                 |
| <b><math>\zeta</math> (Å)</b>           | 0.031                    | 0.032                    | 0.058                    | 0.158                    | 0.235                    | 0.281                    |
| <b><math>\Sigma</math> (°)</b>          | 41.6                     | 42.4                     | 43.6                     | 52.3                     | 65.1                     | 71.4                     |
| <b><math>\Phi</math> (°)</b>            | 131                      | 133                      | 138                      | 158                      | 190                      | 208                      |
| <b>V(FeN<sub>6</sub>) Å<sup>3</sup></b> | 9.861                    | 9.935                    | 9.977                    | 10.858                   | 12.005                   | 12.703                   |
| <b>Spin state</b>                       | LS                       | LS (95%)                 | LS (94%)                 | HS (34%)                 | HS (71%)                 | HS (94%)                 |



**Table S7** Evolution of the coordination sphere parameters as a function of temperature for **2**

|                                         | <b>2150K</b>                     | <b>2250K</b>                     | <b>2300K</b>                     | <b>2350K</b>                      | <b>2400K</b>                       | <b>2450K</b>                        |
|-----------------------------------------|----------------------------------|----------------------------------|----------------------------------|-----------------------------------|------------------------------------|-------------------------------------|
| <b>Fe-N (Å)</b>                         | 1.967(3)<br>1.957(3)<br>1.960(3) | 1.970(3)<br>1.961(3)<br>1.957(3) | 1.977(4)<br>1.968(3)<br>1.966(4) | 2.040(8)<br>2.067(8)<br>1.996(10) | 2.161(9)<br>2.108(10)<br>2.026(11) | 2.206(10)<br>2.135(11)<br>2.044(12) |
| <b>&lt;Fe-N&gt; (Å)</b>                 | 1.961(3)                         | 1.963(4)                         | 1.970(4)                         | 2.0349(9)                         | 2.098(10)                          | 2.128(11)                           |
| <b>ζ (Å)</b>                            | 0.025                            | 0.030                            | 0.031                            | 0.157                             | 0.289                              | 0.34                                |
| <b>Σ (°)</b>                            | 42                               | 43                               | 45                               | 55                                | 66                                 | 71                                  |
| <b>Φ (°)</b>                            | 133                              | 134                              | 138                              | 160                               | 188                                | 198                                 |
| <b>V(FeN<sub>6</sub>) Å<sup>3</sup></b> | 9.950                            | 9.986                            | 10.099                           | 11.044                            | 12.010                             | 12.502                              |
| <b>Spin state</b>                       | LS (95%)                         | LS (94%)                         | LS (90%)                         | HS (40%)                          | HS (71%)                           | HS (87%)                            |

**Table S8** Selected crystallographic parameters at various temperatures for **3**

| <b>Temperature/K</b>                                  | <b>3150K</b>                                                                   | <b>3250K</b>     | <b>3400K</b>                                                                   | <b>3420K</b>     | <b>3250Kcooling</b> | <b>390Kcooling</b> |
|-------------------------------------------------------|--------------------------------------------------------------------------------|------------------|--------------------------------------------------------------------------------|------------------|---------------------|--------------------|
| <b>Formula</b>                                        | C <sub>80</sub> H <sub>64</sub> N <sub>12</sub> S <sub>4</sub> Fe <sub>2</sub> |                  | C <sub>80</sub> H <sub>64</sub> N <sub>12</sub> S <sub>4</sub> Fe <sub>2</sub> |                  |                     |                    |
| <b>F. W. (g/mol)</b>                                  | 1433.37                                                                        |                  | 1433.37                                                                        |                  |                     |                    |
| <b>Size (mm<sup>3</sup>)</b>                          | 0.16×0.08×0.04                                                                 |                  |                                                                                |                  |                     |                    |
| <b>Space group</b>                                    | <i>P4<sub>1</sub>2<sub>1</sub>2</i>                                            |                  |                                                                                |                  |                     |                    |
| <b>a (Å)</b>                                          | 17.5623(8)                                                                     | 17.6315(3)       | 17.6961(5)                                                                     | 17.725(3)        | 17.5254(7)          | 17.3815(7)         |
| <b>c (Å)</b>                                          | 12.1023(8)                                                                     | 12.1717(3)       | 12.5406(5)                                                                     | 12.578(2)        | 12.2143(6)          | 12.1164(5)         |
| <b>Volume (Å<sup>3</sup>)</b>                         | 3732.8(4)                                                                      | 3783.8(16)       | 3927.1(3)                                                                      | 3951.7(15)       | 3751.5(4)           | 3660.6(3)          |
| <b>ρ<sub>calc</sub> (g.cm<sup>-3</sup>)</b>           | 1.275                                                                          | 1.258            | 1.212                                                                          | 1.205            | 1.269               | 1.300              |
| <b>μ (mm<sup>-1</sup>)</b>                            | 0.552                                                                          | 0.545            | 0.525                                                                          | 0.521            | 0.549               | 0.563              |
| <b>GOF on F<sup>2</sup></b>                           | 1.067                                                                          | 1.020            | 1.011                                                                          | 0.935            | 0.982               | 1.049              |
| <b>R<sub>I</sub>, wR<sub>2</sub><br/>[I&gt;2σ(I)]</b> | 0.0264<br>0.0651                                                               | 0.0461<br>0.0922 | 0.0491<br>0.0983                                                               | 0.0463<br>0.0905 | 0.0502<br>0.0766    | 0.0434<br>0.0684   |
| <b>R<sub>I</sub>, wR<sub>2</sub><br/>[all data]</b>   | 0.0288<br>0.0667                                                               | 0.0883<br>0.0922 | 0.1171<br>0.1159                                                               | 0.1867<br>0.1159 | 0.1240<br>0.0903    | 0.0697<br>0.0730   |
| <b>Largest diff.<br/>peak/hole (e.Å<sup>-3</sup>)</b> | 0.418/-<br>0.178                                                               | 0.591/-<br>0.392 | 0.21/-0.16                                                                     | 0.18/-0.17       | 0.34/-0.48          | 0.48/-0.61         |
| <b>Flack value</b>                                    | 0.009(15)                                                                      | 0.003(7)         | 0.022(8)                                                                       | 0.036(12)        | 0.007(9)            | 0.018(8)           |
| <b>CCDC</b>                                           | 1979617                                                                        | 1979618          | 1979620                                                                        | 1979621          | 1979622             | 1979623            |
